# Supplementary material
Source: Springer Nature journal article supplement (https://www.springermedizin.de/resource/supplementary/12967_2011_1078_MOESM6_ESM.pdf/9573664)

**A**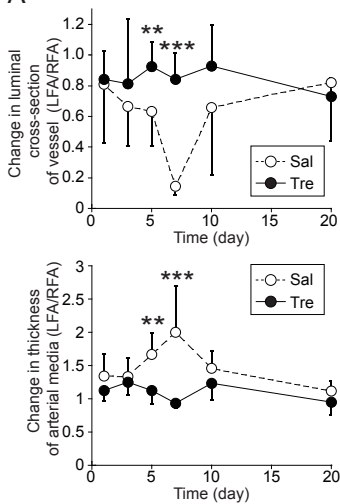**B**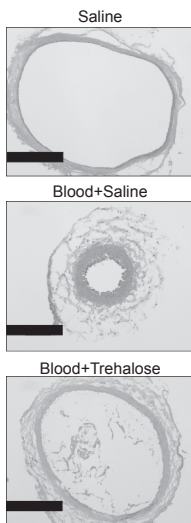**C**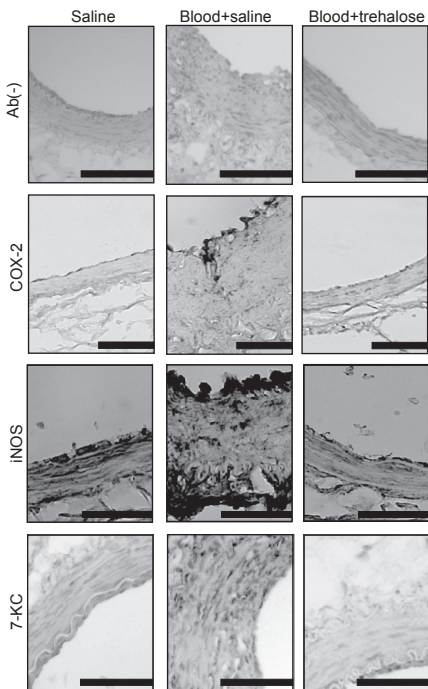

Supplement: MOESM6 [file 9573664]
